# Supplementary material
Source: ML conference proceedings conference paper supplement (https://www.ecva.net/papers/eccv_2022/papers_ECCV/html/136880301_ECCV_2022_paper.php)
Supplement: Supplementary file 1 [file 136880301-supp.pdf]

# Toward Understanding WordArt: Corner-Guided Transformer for Scene Text Recognition # Supplementary File #

Xudong Xie<sup>1</sup>, Ling Fu<sup>1</sup>, Zhifei Zhang<sup>2</sup>, Zhaowen Wang<sup>2</sup>, and Xiang Bai<sup>1</sup>(✉)

<sup>1</sup> Huazhong University of Science and Technology, China  
{xdxie, ling\_fu, xbai}@hust.edu.cn

<sup>2</sup> Adobe Research, USA  
{zzhang, zhawang}@adobe.com

## 1 More Examples from the WordArt Dataset

Fig. 1 demonstrates more artistic text images from our proposed WordArt Dataset. It is a very challenging problem to accurately recognize these artistic texts because of the diverse fonts, extreme deformation, and word effects.

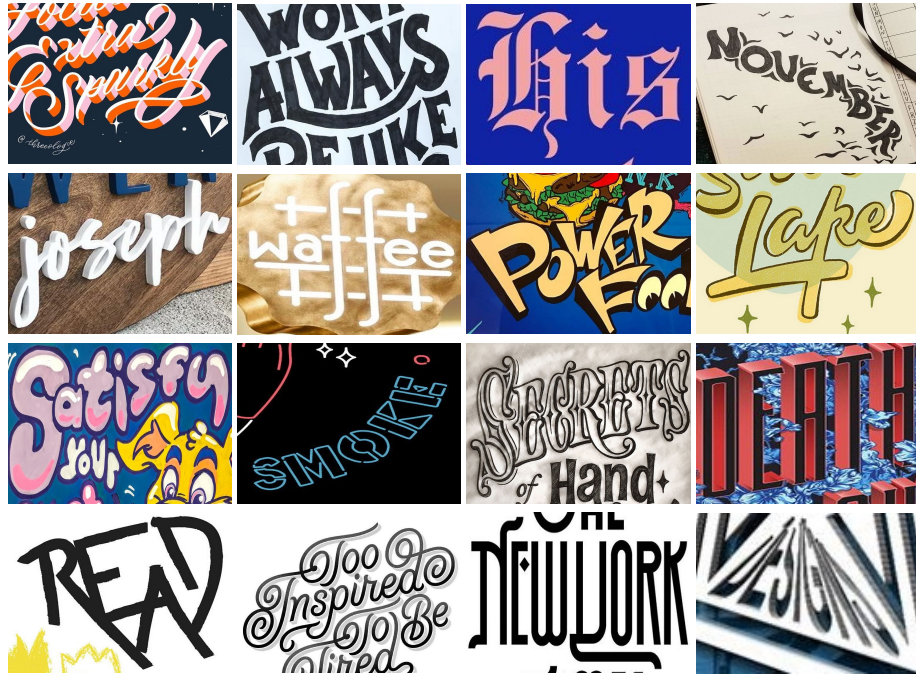

Fig. 1. Artistic text examples from the WordArt dataset

✉ Corresponding author

## 2 More Visualization of Corner Points

As illustrated in Fig. 2, corner points provide a robust representation for the artistic text image, suppressing the interference of appearance and deformation. The corner points of a character are almost invariant and stable. For blurred and low-contrast images, corners can still capture the most critical locations.

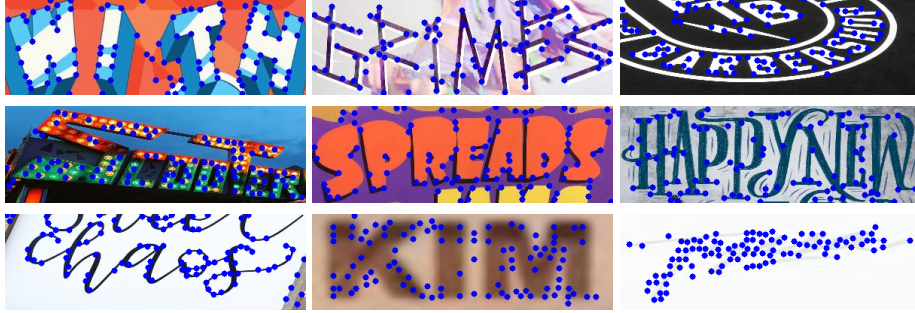

**Fig. 2.** Visualization of corner point detection. Corner points (blue dots) indicate the most critical locations in images that contain rich visual information

## 3 More Visualization of the Encoder Feature Map

Fig. 3 shows the feature map of the final output from our corner-guided encoder. Assisted by our corner-query cross-attention mechanism, the encoder can accurately focus on the position of each character and even the strokes.

## 4 More Qualitative Recognition Results

Fig. 4 shows some qualitative recognition results on WordArt, SVTP [3], ICDAR 2015 [2], and CUTE80 [4]. Our CornerTransformer can cope with artistic texts containing complex fonts, ligatures, and overlaps. It can also recognize extremely curved and deformed texts. Besides, gradient-based corner detection is robust to image resolution, noise, and blur, so CornerTransformer performs well on SVTP and ICDAR 2015, achieving state-of-the-art results.

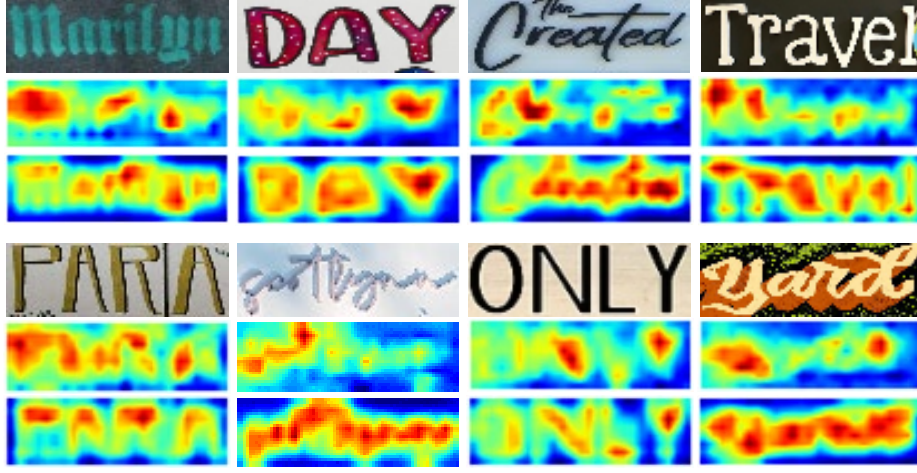

**Fig. 3.** Visualization for the feature map of the encoder output. First row: input images; Second row: feature maps of the baseline; Third row: feature maps of the baseline equipped with the corner-query cross-attention

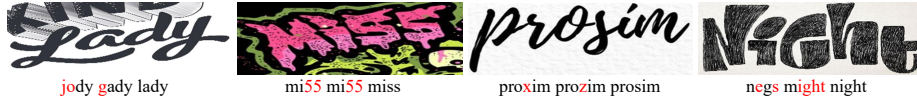

(a) Qualitative results on WordArt

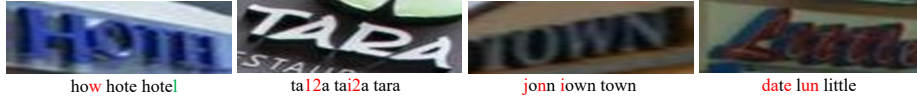

(b) Qualitative results on SVTP [3]

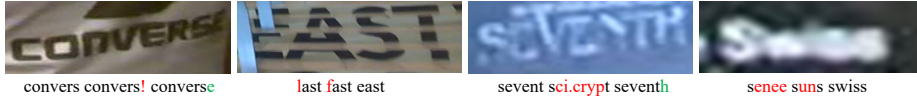

(c) Qualitative results on ICDAR 2015 [2]

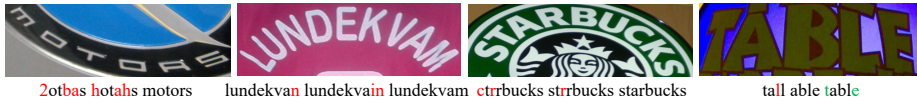

(d) Qualitative results on CUTE80 [4]

**Fig. 4.** Qualitative recognition results on WordArt and irregular benchmarks. Each example is along with the results from ABINet-LV [1], our baseline and the proposed CornerTransformer. Hard examples are successfully recognized by CornerTransformer

## References

1. Fang, S., Xie, H., Wang, Y., Mao, Z., Zhang, Y.: Read like humans: autonomous, bidirectional and iterative language modeling for scene text recognition. In: Proceedings of the IEEE/CVF Conference on Computer Vision and Pattern Recognition. pp. 7098–7107 (2021) [3](#)
2. Karatzas, D., Gomez-Bigorda, L., Nicolaou, A., Ghosh, S., Bagdanov, A., Iwamura, M., Matas, J., Neumann, L., Chandrasekhar, V.R., Lu, S., et al.: Icdar 2015 competition on robust reading. In: 2015 13th international conference on document analysis and recognition (ICDAR). pp. 1156–1160. IEEE (2015) [2](#), [3](#)
3. Phan, T.Q., Shivakumara, P., Tian, S., Tan, C.L.: Recognizing text with perspective distortion in natural scenes. In: Proceedings of the IEEE International Conference on Computer Vision. pp. 569–576 (2013) [2](#), [3](#)
4. Risnumawan, A., Shivakumara, P., Chan, C.S., Tan, C.L.: A robust arbitrary text detection system for natural scene images. *Expert Systems with Applications* **41**(18), 8027–8048 (2014) [2](#), [3](#)
